# Supplementary material for: Factors associated with IPV victimisation of women and perpetration by men in migrant communities of Nepal
Source: PubMed Central journal article supplement (PMC6667197; doi:10.1371/journal.pone.0210258), 2019-07-30
Supplement: pone.0210258.s007.pdf [file pone.0210258.s007.pdf]

**LIST OF DERIVED VARIABLES**

| <b>variable name</b> | <b>variable label</b>                                                               | <b>value labels</b>                                                                                                                      |
|----------------------|-------------------------------------------------------------------------------------|------------------------------------------------------------------------------------------------------------------------------------------|
| age                  | Age of participant                                                                  |                                                                                                                                          |
| ethnic               | Ethnicity                                                                           | 1=Dalit; 2=Janjati; 3=Chhetri;<br>4=Brahmin; 5=other                                                                                     |
| educ                 | Level of education passed                                                           | 0=no education; 1=Primary;<br>2=Secondary; 3=SLC plus(school<br>leaving)                                                                 |
| marital              | Marital status                                                                      | 1=married; 2=previously married;<br>3=never married                                                                                      |
| yrsmarried           | Years married                                                                       |                                                                                                                                          |
| living_arrangement   | current living arrangements                                                         | 1=with partner & children; 2=with<br>partner's family; 3=with partner and<br>natal family; 4=alone with children;<br>5=with natal family |
| older                | Type of participant                                                                 | 1=young 2=older                                                                                                                          |
| relcon               | relationship control (score) high=more control                                      |                                                                                                                                          |
| chtr                 | Childhood trauma (score) high=more trauma                                           |                                                                                                                                          |
| wksk                 | Work stress (score) high=more stress                                                |                                                                                                                                          |
| CommNorms            | Community gender attitudes (score) high=patriarchal                                 |                                                                                                                                          |
| husrel               | women's relations with husband (score)                                              |                                                                                                                                          |
| wfrel                | husband's relation with wife (score)                                                |                                                                                                                                          |
| genattsl             | individual gender attitudes (score) high = patriarchal                              |                                                                                                                                          |
| unempstr             | unemployment stress (score)                                                         |                                                                                                                                          |
| workshame            | shame due to lack of work (score)                                                   |                                                                                                                                          |
| MILcruel             | mother/mother-in-law cruelty( score)                                                |                                                                                                                                          |
| MILkind              | mother/mother-in-law kindness (score)                                               |                                                                                                                                          |
| womdec               | woman's involvement in decision-making , excluded<br>women with no children (score) |                                                                                                                                          |
| mandec               | man's involvement in decision-making, excluded men with<br>no children (score)      |                                                                                                                                          |
| difmony              | Difficult to get money 1=yes                                                        | 0=no 1=yes                                                                                                                               |
| borroweva            | Have borrowed money ever 1=yes                                                      | 0=no 1=yes                                                                                                                               |
| migratework          | Ever migrated for work 1=yes                                                        | 0=no 1=yes                                                                                                                               |
| migratework12m       | Migrated for work in last 12m 1=yes                                                 | 0=no 1=yes                                                                                                                               |
| incomegeneration     | Engaged in an activity to generate income                                           | 0=no 1=yes                                                                                                                               |
| lifsat               | life dissatisfaction higher=more dissatisfied (score)                               |                                                                                                                                          |
| cesd                 | Depression high=more depressed (score)                                              |                                                                                                                                          |
| cesdep               | Depressed 1=yes                                                                     | 0=no 1=yes                                                                                                                               |
| hope                 | Hope high=more hopeful (score)                                                      |                                                                                                                                          |
| hung                 | hunger score, high= hungrier                                                        |                                                                                                                                          |
| pipv12               | any physical ipv in past 12m 1=yes                                                  | 0=no 1=yes                                                                                                                               |
| sipv12               | any s ipv past 12m                                                                  | 0=no 1=yes                                                                                                                               |
| emab12               | any emotional ipv in last 12m                                                       | 0=no 1=yes                                                                                                                               |
| pipv                 | any physical ipv ever 1=yes                                                         | 0=no 1=yes                                                                                                                               |
| sipv                 | any sexual ipv ever                                                                 | 0=no 1=yes                                                                                                                               |
| psipv                | phyiscal or sexual IPV ever                                                         | 0=no 1=yes                                                                                                                               |

|                    |                                                   |                              |
|--------------------|---------------------------------------------------|------------------------------|
| empsipv12          | any emotional,sexual or physical ipv in last 12m  | 0=no 1=yes                   |
| health             | Self assessment of health 1=good/excellent        | 0=no 1=good/excellent        |
| health2            | Self assessment of health 1=fairly good/excellent | 0=no 1=fairly good/excellent |
| suicidal           | Have suicidal thoughts or attempted suicide 1=yes | 0=no 1=yes                   |
| quarrel            | Frequency of quarrelling 1=sometimes/often        | 0=none 1=sometimes/often     |
| alcohol            | Ever drunk alcohol                                | 0=no 1=yes                   |
| alcohol12m         | Drunk alcohol in past 12m                         | 0=no 1=yes                   |
| partdrink          | Partner drinks alcohol 1=yes                      | 0=no 1=yes                   |
| partnerage         | Partner's age                                     |                              |
| ageatfirstmarriage | Age at first marriage                             |                              |
